# Supplementary material for: Exact inversion of partially coherent dynamical electron scattering for picometric structure retrieval
Source: Springer Nature journal article supplement (doi:10.1038/s41467-023-44268-x), 2024-01-02
Supplement: MOESM3 [file 41467_2023_44268_MOESM3_ESM.pdf › 41467_2023_44268_MOESM3_ESM.pdf]

## **Description of Additional Supplementary Files:**

**Supplementary Software 1:** Source code for multislice forward simulation, and parametrized as well as pixel-based inverse multislice reconstruction as presented in the main article.
